# Supplementary material for: Exploring Impact of Rare Variation in Systemic Lupus Erythematosus by a Genome Wide Imputation Approach
Source: Front Immunol. 2019 Feb 26;10:258. doi: 10.3389/fimmu.2019.00258 (PMC6399402; doi:10.3389/fimmu.2019.00258)
Supplement: Supplementary file 3 [file Table_3.xlsx]

## Sheet: diseasesOMIMlist
Supplemental Table 3. OMIM diseases annotations for genes associated to SLE by rare variation.
Gene	OMIM annotation
INS	Diabetes mellitus, insulin-dependent, 2, 125852 (3)
INS	Diabetes mellitus, permanent neonatal, 606176 (3)
INS	Hyperproinsulinemia, 616214 (3)
INS	Maturity-onset diabetes of the young, type 10, 613370 (3)
ZEB1	Corneal dystrophy, Fuchs endothelial, 6, 613270 (3)
ZEB1	Corneal dystrophy, posterior polymorphous, 3, 609141 (3)
ALOX5AP	{Stroke, susceptibility to}, 601367 (3)
STAT4	{Systemic lupus erythematosus, susceptibility to, 11}, 612253 (3)
LIPA	Cholesteryl ester storage disease, 278000 (3)
LIPA	Wolman disease, 278000 (3)
ALOX12B	Ichthyosis, congenital, autosomal recessive 2, 242100 (3)
LAMA1	Poretti-Boltshauser syndrome, 615960 (3)
RB1	Bladder cancer, somatic, 109800 (3)
RB1	Osteosarcoma, somatic, 259500 (3)
RB1	Retinoblastoma, 180200 (3)
RB1	Retinoblastoma, trilateral, 180200 (3)
RB1	Small cell cancer of the lung, somatic, 182280 (3)
RSPO1	Palmoplantar hyperkeratosis and true hermaphroditism, 610644 (3)
RSPO1	Palmoplantar hyperkeratosis with squamous cell carcinoma of skin and sex reversal, 610644 (3)
TBX4	Small patella syndrome, 147891 (3)
CARD14	Pityriasis rubra pilaris, 173200 (3)
CARD14	Psoriasis 2, 602723 (3)
COL5A2	Ehlers-Danlos syndrome, classic type, 130000 (3)
CTSK	Pycnodysostosis, 265800 (3)
ALG11	Congenital disorder of glycosylation, type Ip, 613661 (3)
CYP26B1	Craniosynostosis with radiohumeral fusions and other skeletal and craniofacial anomalies, 614416 (3)
NODAL	Heterotaxy, visceral, 5, 270100 (3)
CEL	Maturity-onset diabetes of the young, type VIII, 609812 (3)
C4A	C4a deficiency, 614380 (3)
C4A	[Blood group, Rodgers], 614374 (3)
RAB18	Warburg micro syndrome 3, 614222 (3)
WNT10A	Odontoonychodermal dysplasia, 257980 (3)
WNT10A	Schopf-Schulz-Passarge syndrome, 224750 (3)
WNT10A	Tooth agenesis, selective, 4, 150400 (3)
MUSK	Fetal akinesia deformation sequence, 208150 (3)
MUSK	Myasthenic syndrome, congenital, 9, associated with acetylcholine receptor deficiency, 616325 (3)
CSTA	Exfoliative ichthyosis, autosomal recessive, ichthyosis bullosa of Siemens-like, 607936 (3)
HGD	Alkaptonuria, 203500 (3)
SF3B4	Acrofacial dysostosis 1, Nager type, 154400 (3)
CRYBA1	Cataract 10, multiple types, 600881 (3)
FLVCR2	Proliferative vasculopathy and hydraencephaly-hydrocephaly syndrome, 225790 (3)
MPL	Myelofibrosis with myeloid metaplasia, somatic, 254450 (3)
MPL	Thrombocythemia 2, 601977 (3)
MPL	Thrombocytopenia, congenital amegakaryocytic, 604498 (3)
BTD	Biotinidase deficiency, 253260 (3)
BCL3	Leukemia/lymphoma, B-cell, 3 (2)
NDN	Prader-Willi syndrome, 176270 (3)
GATA4	?Testicular anomalies with or without congenital heart disease, 615542 (3)
GATA4	Atrial septal defect 2, 607941 (3)
GATA4	Atrioventricular septal defect 4, 614430 (3)
GATA4	Tetralogy of Fallot, 187500 (3)
GATA4	Ventricular septal defect 1, 614429 (3)
KLF1	Blood group--Lutheran inhibitor, 111150 (3)
KLF1	Dyserythropoietic anemia, congenital, type IV, 613673 (3)
KLF1	[Hereditary persistence of fetal hemoglobin], 613566 (3)
PDE6H	Achromatopsia 6, 610024 (3)
PDE6H	Retinal cone dystrophy 3, 610024 (3)
PSMB8	Autoinflammation, lipodystrophy, and dermatosis syndrome, 256040 (3)
RBBP8	Jawad syndrome, 251255 (3)
RBBP8	Pancreatic carcinoma, somatic (3)
RBBP8	Seckel syndrome 2, 606744 (3)
HLA-DRB1	{Multiple sclerosis, susceptibility to, 1}, 126200 (3)
HLA-DRB1	{Pemphigoid, susceptibility to} (2)
HLA-DRB1	{Rheumatoid arthritis, susceptibility to}, 180300 (3)
HLA-DRB1	{Sarcoidosis, susceptibility to, 1}, 181000 (3)
TNFRSF10B	Squamous cell carcinoma, head and neck, 275355 (3)
LRP4	?Myasthenic syndrome, congenital, 17, 616304 (3)
LRP4	Cenani-Lenz syndactyly syndrome, 212780 (3)
LRP4	Sclerosteosis 2, 614305 (3)
COG7	Congenital disorder of glycosylation, type IIe, 608779 (3)
AMACR	Alpha-methylacyl-CoA racemase deficiency, 614307 (3)
AMACR	Bile acid synthesis defect, congenital, 4, 214950 (3)
ANG	Amyotrophic lateral sclerosis 9, 611895 (3)
MMACHC	Methylmalonic aciduria and homocystinuria, cblC type, 277400 (3)
DOCK8	Hyper-IgE recurrent infection syndrome, autosomal recessive, 243700 (3)
HAX1	Neutropenia, severe congenital 3, autosomal recessive, 610738 (3)
TAF15	Chondrosarcoma, extraskeletal myxoid, 612237 (1)
NKX2-5	Atrial septal defect 7, with or without AV conduction defects, 108900 (3)
NKX2-5	Conotruncal heart malformations, variable, 217095 (3)
NKX2-5	Hypoplastic left heart syndrome 2, 614435 (3)
NKX2-5	Hypothyroidism, congenital nongoitrous, 5, 225250 (3)
NKX2-5	Tetrology of Fallot, 187500 (3)
NKX2-5	Ventricular septal defect 3, 614432 (3)
EARS2	Combined oxidative phosphorylation deficiency 12, 614924 (3)
TTR	Amyloidosis, hereditary, transthyretin-related, 105210 (3)
TTR	Carpal tunnel syndrome, familial, 115430 (3)
TTR	[Dystransthyretinemic hyperthyroxinemia], 145680 (3)
HOXA1	Athabaskan brainstem dysgenesis syndrome, 601536 (3)
HOXA1	Bosley-Salih-Alorainy syndrome, 601536 (3)
DES	?Muscular dystrophy, limb-girdle, type 2R, 615325 (3)
DES	Cardiomyopathy, dilated, 1I, 604765 (3)
DES	Myopathy, myofibrillar, 1, 601419 (3)
DES	Scapuloperoneal syndrome, neurogenic, Kaeser type, 181400 (3)
ZNF513	Retinitis pigmentosa 58, 613617 (3)
LZTFL1	Bardet-Biedl syndrome 17, 615994 (3)
UBE3A	Angelman syndrome, 105830 (3)
FUT2	[Bombay phenotype] (3)
FUT2	{Norwalk virus infection, resistance to} (3)
FUT2	{Vitamin B12 plasma level QTL1}, 612542 (3)
FEZF1	Hypogonadotropic hypogonadism with or without anosmia, 616030 (3)
F2	Dysprothrombinemia, 613679 (3)
F2	Hypoprothrombinemia, 613679 (3)
F2	Thrombophilia due to thrombin defect, 188050 (3)
F2	{Pregnancy loss, recurrent, susceptibility to, 2}, 614390 (3)
F2	{Stroke, ischemic, susceptibility to}, 601367 (3)
TSEN2	Pontocerebellar hypoplasia type 2B, 612389 (3)
FANCA	Fanconi anemia, complementation group A, 227650 (3)
WNK4	Pseudohypoaldosteronism, type IIB, 614491 (3)
DDX58	Singleton-Merten syndrome 2, 616298 (3)
KIF7	?Hydrolethalus syndrome 2, 614120 (3)
KIF7	Acrocallosal syndrome, 200990 (3)
KIF7	Joubert syndrome 12, 200990 (3)
MCPH1	Microcephaly 1, primary, autosomal recessive, 251200 (3)
FGF5	Trichomegaly, 190330 (3)
VIL1	Cholestasis, progressive canalicular (1)
TSHZ1	Aural atresia, congenital, 607842 (3)
TNFRSF11A	Osteolysis, familial expansile, 174810 (3)
TNFRSF11A	Osteopetrosis, autosomal recessive 7, 612301 (3)
TNFRSF11A	{Paget disease of bone 2, early-onset}, 602080 (3)
